# Supplementary material
Source: PubMed Central journal article supplement (PMC3478426)

## Supplementary data

**Supplementary Figure S1. Characterization of MDSCs expanded during the EAE progression.** C57BL/6 mice were immunized with MOG<sub>35-55</sub>/CFA. Two weeks post immunization, the phenotype of splenic MDSCs was analyzed using FACS. **A.** Ly6C and Ly6G expression on CD11b<sup>+</sup> cells was examined. **B.** The morphology of CD11b<sup>+</sup>Gr-1<sup>+</sup> cells was examined using standard Giemsa staining and microscope. **C.** Expression of CD11c, F4/80, MHC II and CD80 on CD11b<sup>+</sup>Gr-1<sup>+</sup> cells. **D.** FACS analysis of the expression of CD115, CCR2, CD62L and Ly6C. **E-G.** MDSCs from EAE mice suppress T cell activation by CD3/CD28 engagement or antigen stimulation. **E.** CFSE labeled splenocytes from naïve C57BL6 mice were treated with anti-CD3/CD28 antibodies (1 µg/mL) in the absence or presence of MDSCs for 3 days. T cell proliferation was analyzed using CFSE dilution assay (*left*). Cell viability was determined by FACS after staining with 7-AAD (*right*). Filled grey: T cells without stimulation; red: T cells with stimulation; black, T cells with stimulation in the presence of MDSCs (1:1). **F.** IFN-γ production from CD4 cells was analyzed by intracellular staining assays. **G.** For antigen-specific activation, BMDCs loaded with MOG<sub>35-55</sub> peptide (1 µg/mL) were co-cultured with MOG<sub>35-55</sub>-specific CD4<sup>+</sup> T cells derived from the 2D2 transgenic mice (1:100) in the absence or presence of MDSCs. CD4<sup>+</sup> T cell proliferation was determined using <sup>3</sup>H thymidine incorporation assay. \*,  $p < 0.05$

## Supplementary Figure S2. Effects of MDSCs from different sources on Th17 differentiation.

**A.** Similar effect of MDSCs isolated using MACS beads or FACS sorting on Th17 cell polarization. Naïve CD4<sup>+</sup> T cells were induced for Th17 cell differentiation in the presence of MDSCs prepared using different methods. The frequency of Th17 cells and IL-17 levels were analyzed by flow cytometry and ELISA, respectively. N.S. Not significant. **B.** MDSCs derived from tumor-bearing mice are highly efficient in promoting Th17 differentiation. Naïve CD4<sup>+</sup>CD25<sup>-</sup>CD62L<sup>+</sup> T cells ( $5 \times 10^5$  per well in 24-well plates) were co-cultured with or without MDSCs from B16 tumor bearing mice under Th17-polarizing conditions for 3 days. Cells were washed and examined for IL-17A or IFN-γ expression by intracellular staining assays and FACS. Data represent two independent experiments. **C-E.** MDSCs promote Th17 cell expansion. Naïve CD4<sup>+</sup> T cells were induced for Th17 cell differentiation in the presence of MDSCs for 3 days. CD4<sup>+</sup> T cells were then sorted, CFSE-labeled, and seeded in 24-well plates pre-coated 1 µg/ml anti-CD3 Abs ( $5 \times 10^5$  cells per well). Cells were cultured in the presence or absence of MDSCs (1:1) for additional 72 hours. Cell proliferation was analyzed using CFSE dilution assays (**C**). Cells were subjected to intracellular IL-17A staining and FACS analysis, and the number of Th17 cells are calculated (**D**). The levels of IL-17A in the supernatants were assessed using ELISA assays (**E**). Data represent two independent experiments.

**Supplementary Figure S3. Arginase1, not NOS2, is also involved in MDSC-enhanced Th17 differentiation.** MDSCs were co-cultured with naïve CD4<sup>+</sup>CD25<sup>-</sup>CD62L<sup>+</sup> T cells ( $5 \times 10^5$  per well in 24-well plates) cells at 1:1 ratio under Th17 polarizing conditions in the presence of NOS2 inhibitor, L-N<sup>6</sup>-(1-iminoethyl)-lysine (L-NIL, 500 µM), IL-17A expression was examined using intracellular staining and ELISA assays (**A**). Alternatively, arginase1 inhibitor, nor-NOHA (300 µM) was used in the co-culture (**B**). Intracellular IL-17A expression was examined using

FACS analysis. Additionally, IL-1 $\beta$  production from MDSCs was also assessed using intracellular staining assays.

**Supplementary Figure S4. Effects of GEM treatment on immune cell subsets and EAE disease progression.** **A-B.** GEM treatment does not alter the overall levels of T, B, NK cells and DCs. Mice (n=3) were immunized with MOG<sub>35-55</sub>/CFA, followed by administration of pertussis toxin. GEM (100 mg/kg) was injected 11 days after EAE induction. At the indicated time points, cells prepared from the peripheral blood (**A**), spleen and lymph nodes (**B**) were analyzed by flow cytometry for potential influence of GEM-mediated MDSC depletion on various immune cell subsets, including CD4 T cells (CD3<sup>+</sup>CD4<sup>+</sup>), CD8 T cells (CD3<sup>+</sup>CD8<sup>+</sup>), NK cells (CD3<sup>-</sup>NK1.1<sup>+</sup>), B cells (B220<sup>+</sup>), cDCs (CD11c<sup>+</sup>B220<sup>-</sup>), and pDCs (CD11c<sup>+</sup>B220<sup>+</sup>). Data represent two independent experiments. **C. Effect of different doses of GEM on EAE incidence and progression.** C57BL/6 mice (n=5) were immunized with MOG<sub>35-55</sub>/CFA, followed by intraperitoneal administration of pertussis toxin on days 0 and 2. Mice received GEM treatment at the doses of 10 mg/kg or 50 mg/kg as indicated on days 4, 8, 12, 16. EAE incidence (**C**) and mean clinical scores (**D**) were recorded. **E.** MDSCs in the peripheral blood were analyzed 2 days after the last GEM treatment using FACS. Data represent two independent experiments.

Supplementary Figure S1

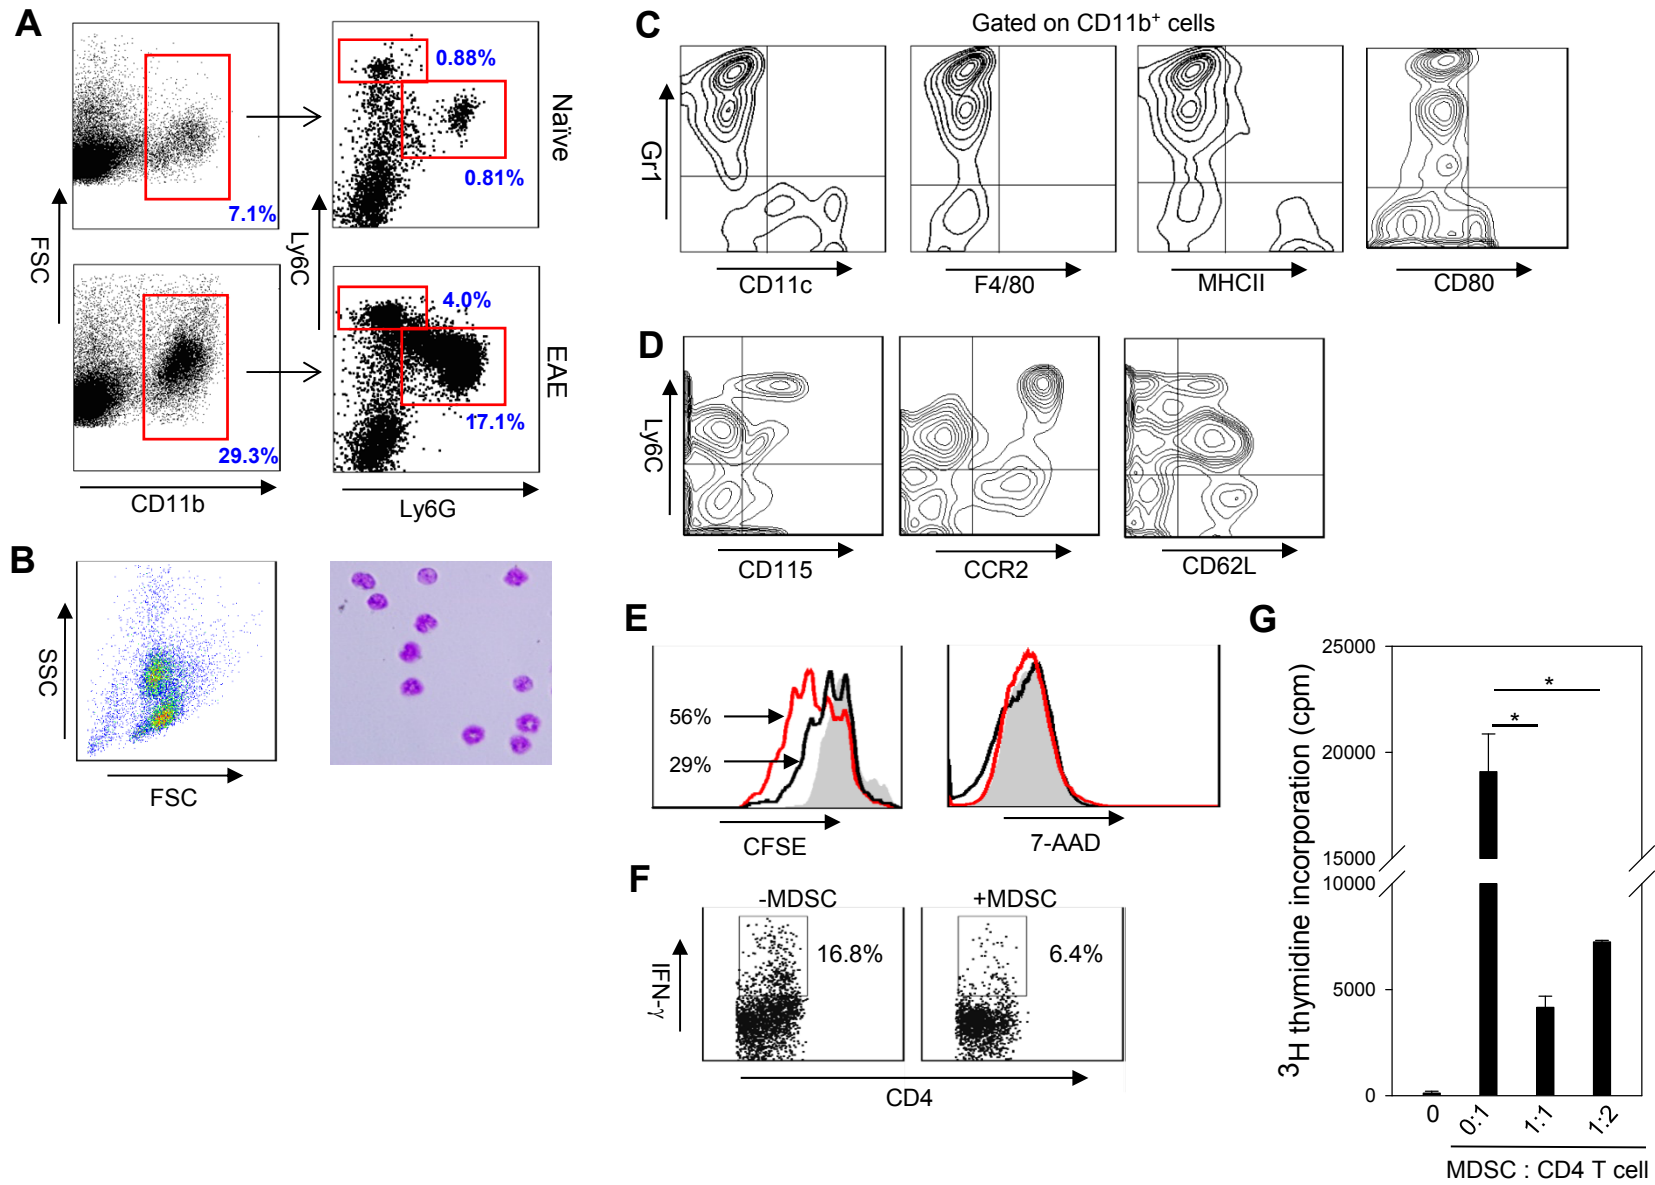

Supplementary Figure S2

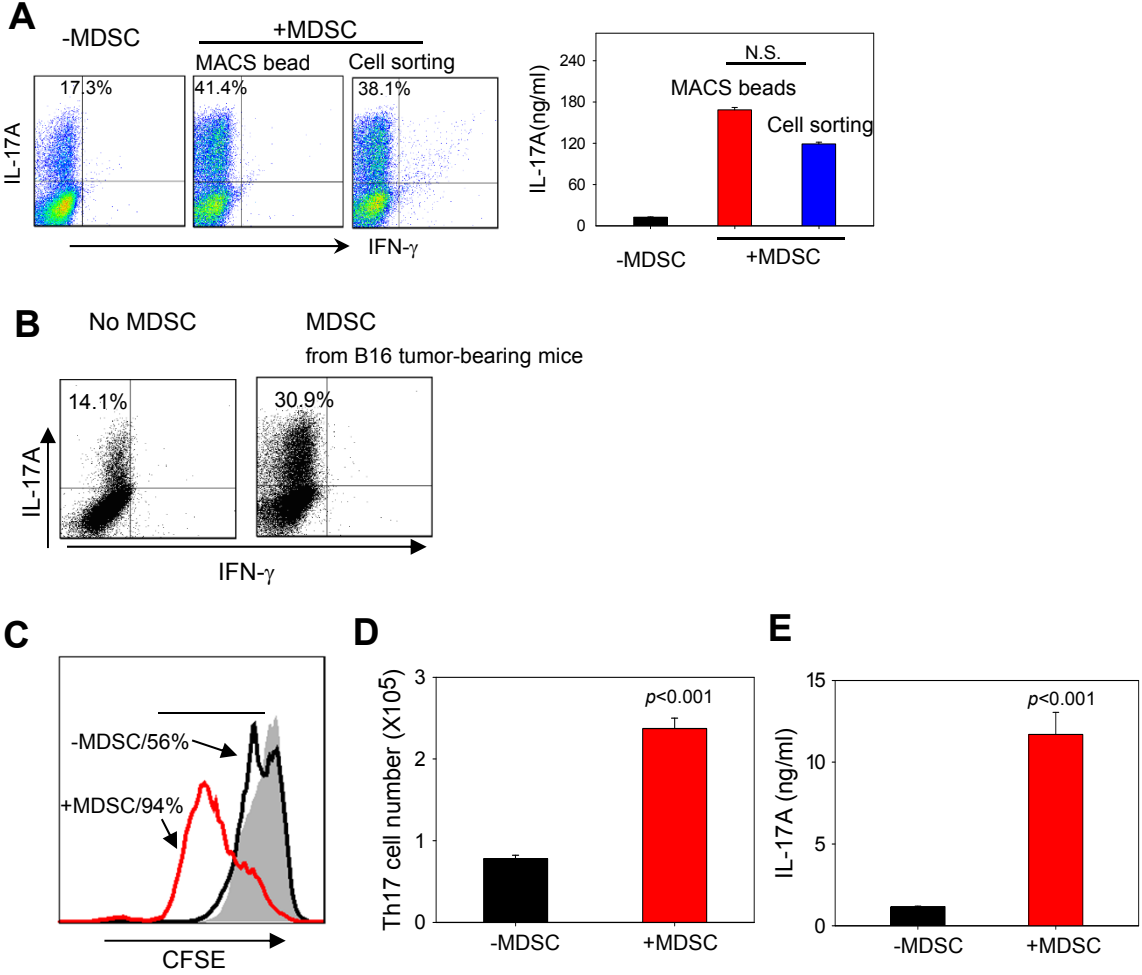

Supplementary Figure S3

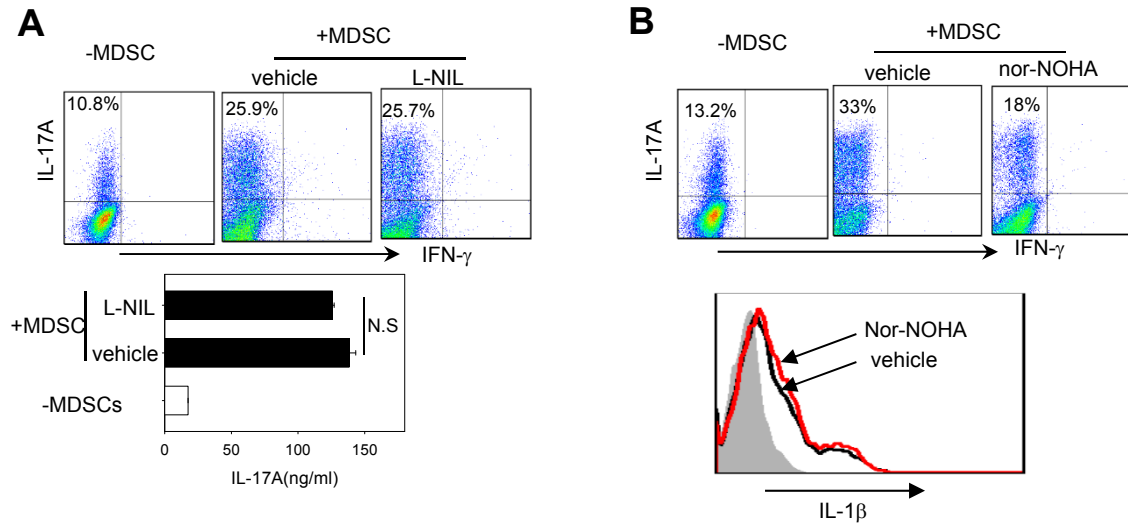

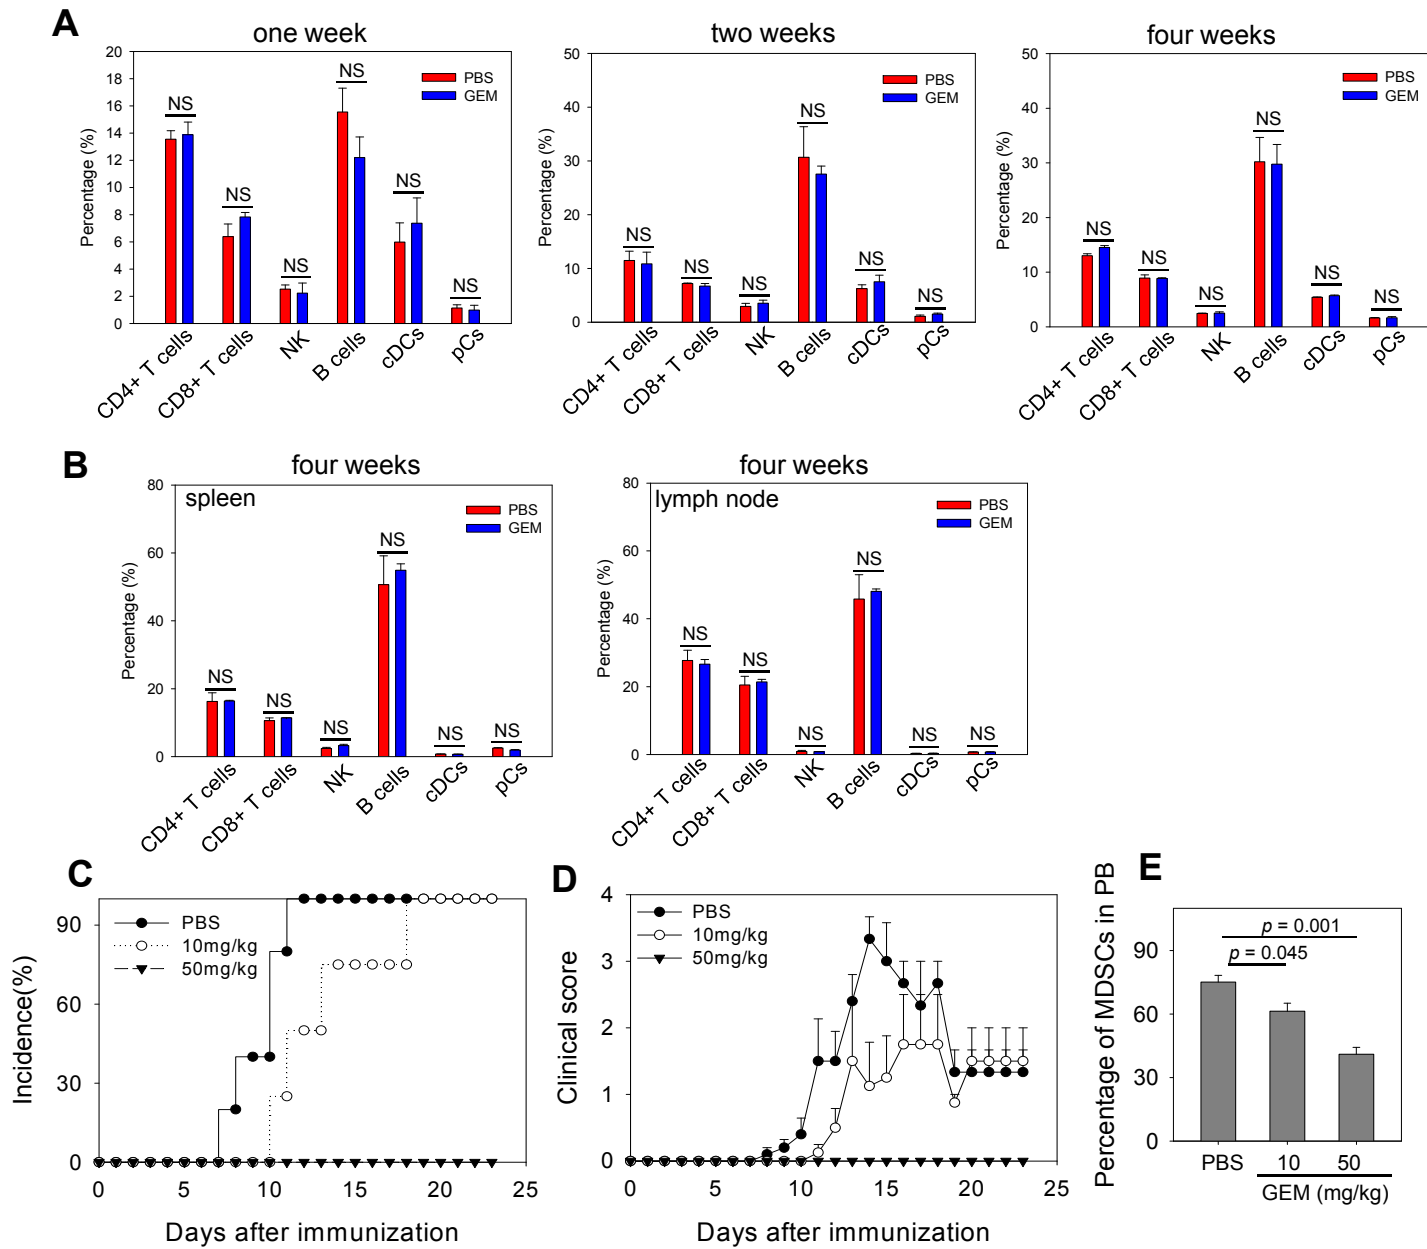

Supplement: NIHMS404830-supplement-1.pdf [file NIHMS404830-supplement-1.pdf]
